# Supplementary material for: Recognition of H3K9 methylation by GLP is required for efficient establishment of H3K9 methylation, rapid target gene repression, and mouse viability
Source: PubMed Central journal article supplement — Genes Dev. 2015 Feb 15;29(4):379–93. doi: 10.1101/gad.254425.114 (PMC4335294; doi:10.1101/gad.254425.114), 2015-02-15
Supplement: supp_gad.254425.114_Supplemental_Material.pdf [file supp_gad.254425.114_Supplemental_Material.pdf]

## Supplementary Materials

### Table of contents

- **Supplemental Figure Legends**
- **Supplemental Figures 1-9**
- **Supplemental Tables 1-4**

- **Supplemental Figure Legends**

**Supplemental Figure 1.** Stimulation of G9a activity by nucleosomes that are pre-methylated at H3K9. (A, B) HMT activity assay at nucleosomes flanked by nucleosomes pre-modified at H3K9 with wild-type G9a or its catalytic mutant. (C) G9a HMT activity assay at H3K27A-containing nucleosomes flanked by nucleosomes pre-modified at H3K9. (D) G9a HMT activity assay at nucleosomes flanked by nucleosomes pre-modified at H3K27. (E) G9a 3A mutant HMT activity assay at nucleosomes flanked by nucleosomes pre-modified at H3K9. (1  $\mu$ g of recombinant enzymes and 1  $\mu$ g of recombinant oligonucleosomes were used in the assay.)

**Supplemental Figure 2.** ITC experiments showing titration of H3K9 mono-, di- or tri- methylated peptides with the ankyrin repeat domains of wild-type GLP, GLP 3A, wild-type G9a or G9a 3A.

**Supplemental Figure 3.** Stimulation of G9a activities by nucleosomes pre-methylated at H3K9 is a *cis* event. (A) HMT assay of G9a at nucleosomes exist *in cis* and in *trans* with pre-modified nucleosomes. The untagged unmodified histones exist *in cis* with pre-modified nucleosomes. (B, C) HMT assay of G9a (B) and GLP (C) at nucleosomes exist *in cis* and in *trans* with pre-modified nucleosomes. The Flag-tagged unmodified histones exist *in cis* with pre-modified nucleosomes. (D) Methylated H3K9 peptides did not stimulate the HMT activity of G9a. (1  $\mu$ g of recombinant enzymes, 0.5  $\mu$ g of peptides and 1  $\mu$ g of recombinant oligonucleosomes were used in the assay.)

**Supplemental Figure 4.** Targeting vector design for G9a 3A and GLP 3A mutants, and cDNA sequencing results. cDNA fragments covering the targeted vector were amplified and cloned. 24 clones were randomly picked and sent for sequencing. The number of clones corresponding to wild-type or 3A mutant alleles were counted and summarized in the inset.

**Supplemental Figure 5.** Phenotypes of GLP<sup>MM</sup> mice. (A) Statistics of G9a<sup>+M</sup> intercross showed Medelian ratio of the three genotypes. (B) The rare, survived GLP<sup>MM</sup> mice displayed severe growth retardation at indicated time. (C) Gross weight of littermate embryos at given developmental stages. Error bars represent the Standard Error. (D) Alzarin red staining of skulls of GLP<sup>+/+</sup> and GLP<sup>MM</sup> at indicated stages. (E) Alzarin red staining of adult GLP<sup>+/+</sup> and GLP<sup>MM</sup> mice skulls. Note the bone loss at metopic suture (arrow) and bent nose defects (arrowhead). (F) Photos showing malocclusion of adult GLP<sup>MM</sup> survived mice.

**Supplemental Figure 6.** Analysis of H3K9me2 levels in ES cells and tissues. (A) Karyotype of WT and GLP 3A ES cells. (B) RT-qPCR for *GLP* expression in WT and GLP 3A ES cells. (C) Western blots for H3K9me2 in ESCs and ESCs treated with 0.5  $\mu$ M UNC0638, an inhibitor of G9a and GLP. (D) Western blots for H3K9me2 in livers (*left*) or brains (*right*) from multiple pairs of neonatal mice. (E) MA-plot of H3K9me2 fold changes for all 10-kb genomic windows between GLP 3A and wild-type ESCs (*left*) or livers (*right*).

**Supplemental Figure 7.** Defective H3K9me2 establishment and inefficient gene repression during ES cell differentiation. (A) RT-qPCR showing inefficient repression of *Oct4* in a second line of GLP 3A ES cells (line 1-7 and 1-6, wild-type and GLP 3A, respectively). (B) ChIP-qPCR results showing H3K9me2 occupancy at indicated loci in a second line of GLP 3A ES cells after RA treatment. (C) ChIP-qPCR results showing H3K9me2 occupancy at indicated loci on day 5 of EB differentiation. (D)

RT-qPCR showing inefficient repression of *Oct4* during EB differentiation. (E) Bisulfite sequencing of *Oct4* promoter region during EB differentiation.

**Supplemental Figure 8.** The H3K9 methylation binding activity of GLP was required for efficient H3K9me2 establishment during ES cell differentiation at genome-wide level. (A) Western blot showing GLP protein levels were comparable in RA induced WT and GLP 3A cells. (B) Pairwise cross correlation between every two samples. Pearson correlation coefficients were calculated based on the 10-kb windows which were used in Fig. 5A-C. Color depth and box height indicates the degree of correlation. (C) For genes displaying a more than 2-fold increase of H3K9me2 during RA-induced WT differentiation, H3K9me2 ratio between GLP 3A and WT cells before and after RA treatment were plotted. The categories were divided according to different levels of H3K9me1 ratio between GLP 3A and WT ESCs. (D) Clustering of the 10-kb genomic windows according to their H3K9me1 levels for wild-type and GLP 3A cells with or without RA treatment. Windows were selected and clustered as described in Fig. 5A, except that the H3K9me1 data were used. (E) Accumulative distribution of the H3K9me2 enrichment level in WT and GLP 3A ES cells. (F) Accumulative distribution of the H3K9me2 enrichment level in RA-treated WT and GLP 3A cells. P values in (E) and (F) were calculated by *t*-test.

**Supplemental Figure 9.** Analysis of H3K9me2 establishment and gene expression at the control gene set. (A) MA-plot of H3K9me2 fold changes against the average H3K9me2 fold enrichment in GLP 3A cells. Red dots represent genes with significantly increased H3K9me2 level after RA treatment in GLP 3A cells. (B) Box plot of H3K9me2 fold changes between ES cells and RA-treated cells at genes acquired or lost H3K9me2 (Supplemental Fig. 8A) in wild-type and GLP 3A cells. (C) Histogram showing the expression change of genes acquired H3K9me2 (Fig. S9A) in GLP 3A cells during differentiation. Black bars: unchanged, red bars: repressed, green bars: activated. (D) Expression comparison of the genes acquired H3K9me2 in GLP 3A cells (Supplemental Fig. 9A)

between wild-type and GLP 3A ES cells (*left*) or RA-treated cells (*right*). Note: red bars and red dots in (C, D) represent the same set of genes, and all the dots shown in Supplemental Fig. 9C-D represent the red dots in Supplemental Fig. 9A. (E) GO term analysis of the 329 genes that failed to be activated in GLP 3A cells during differentiation. F.E. represents fold enrichment.

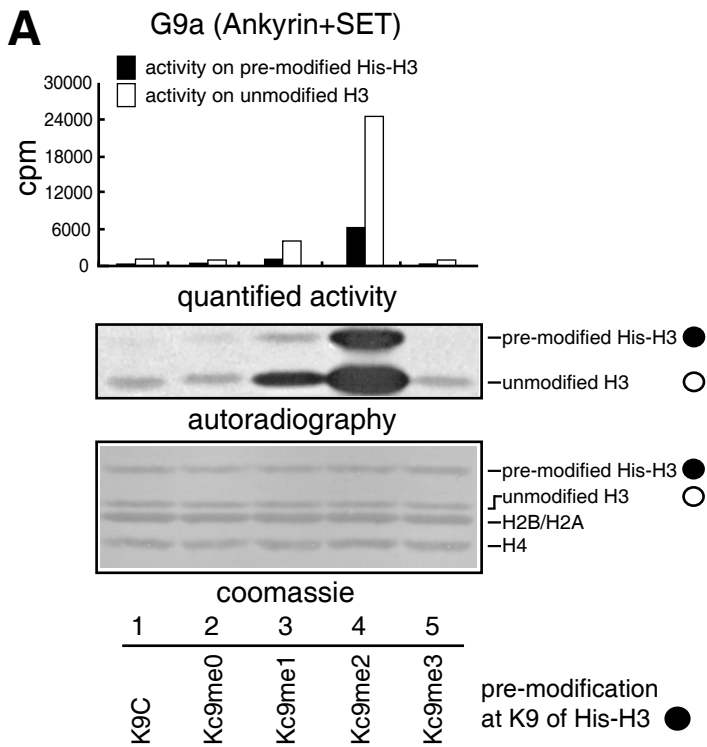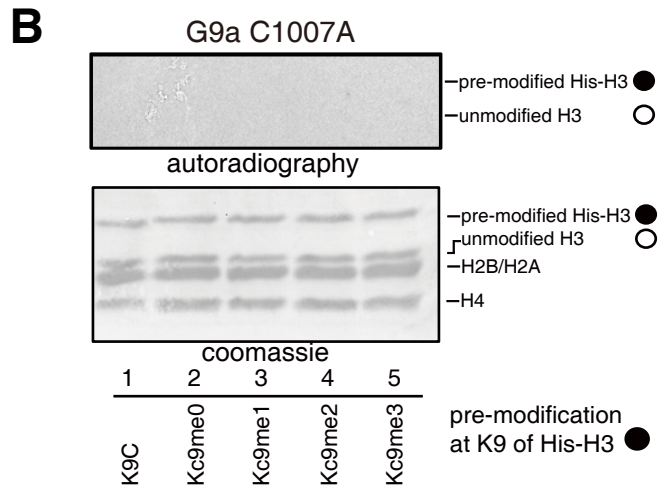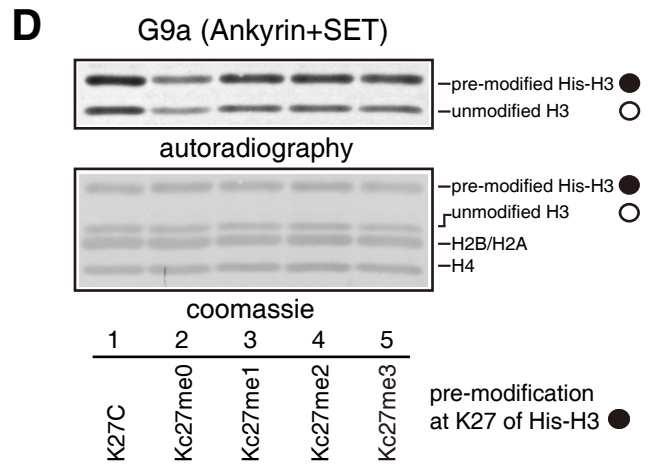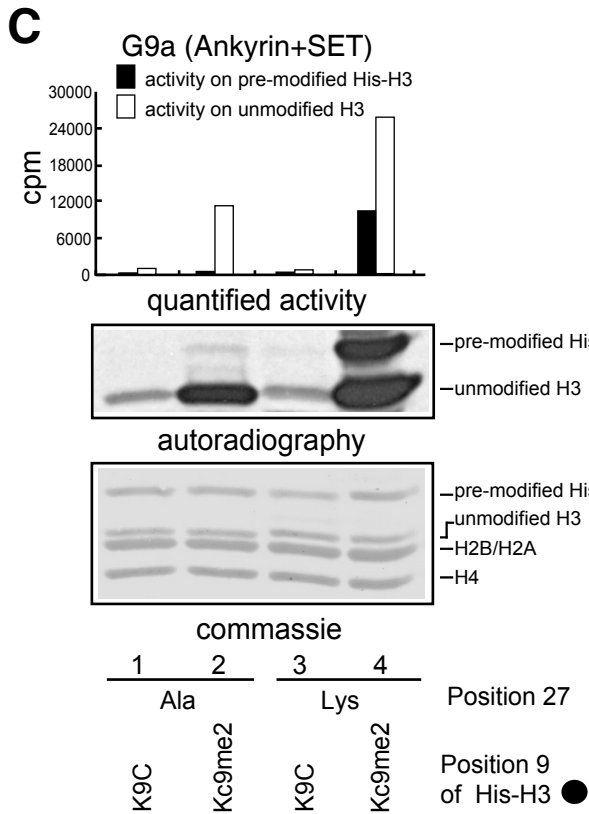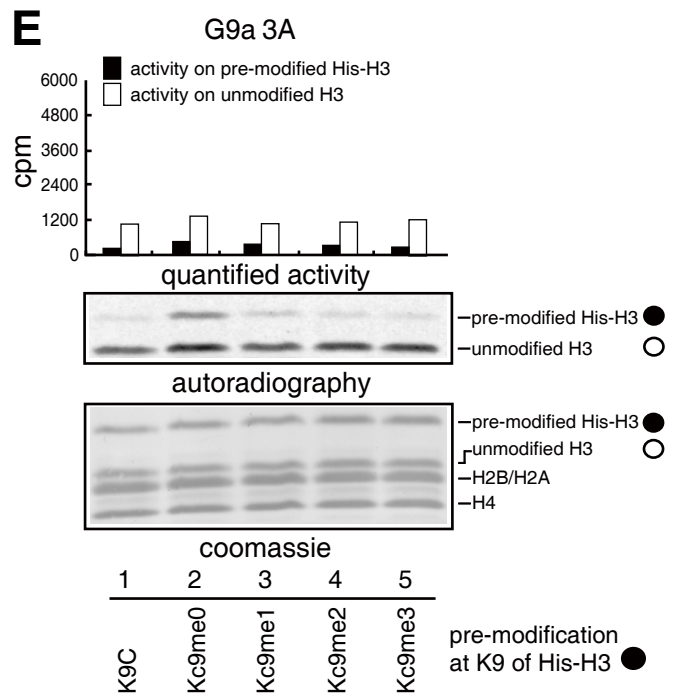

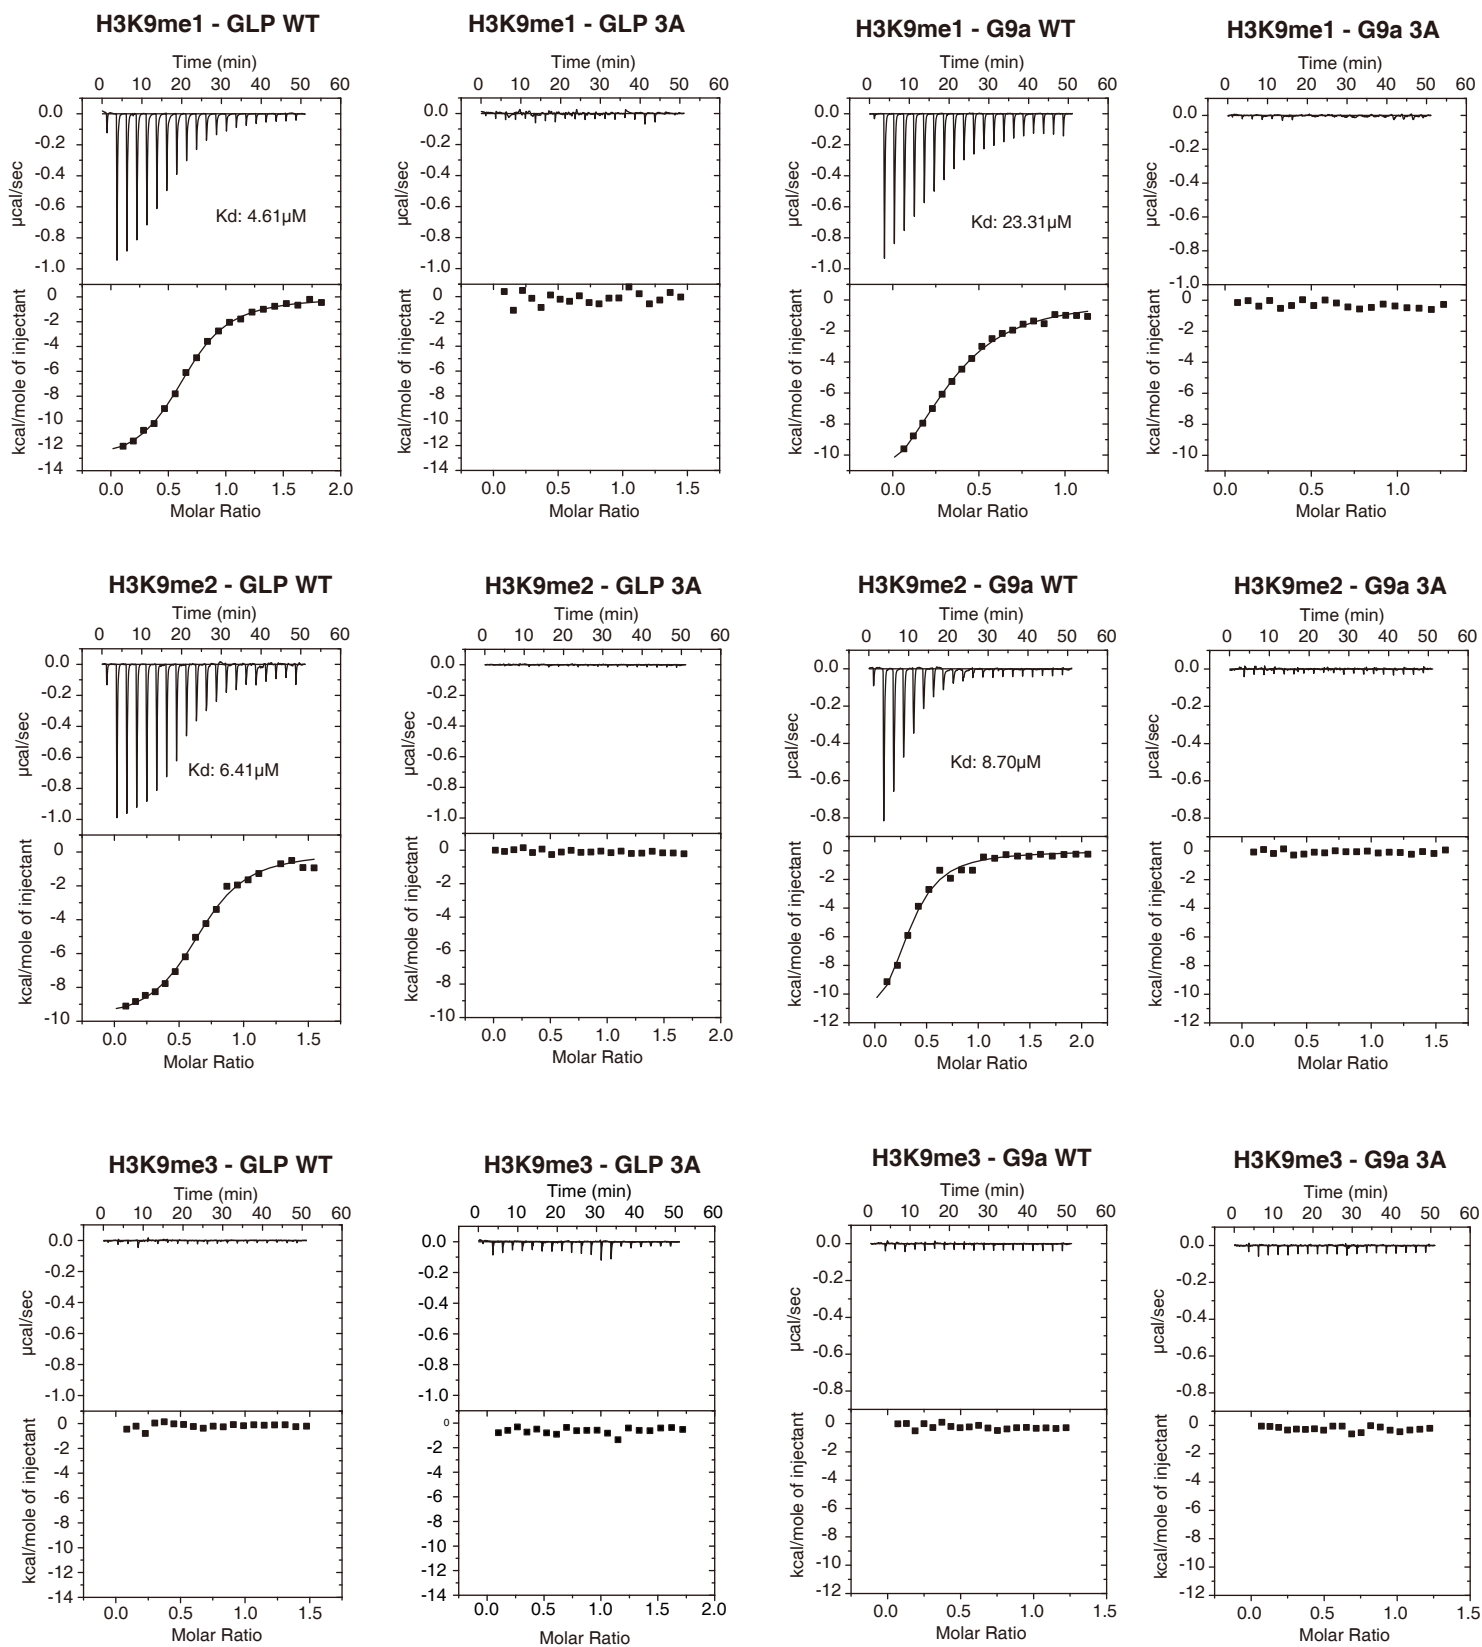

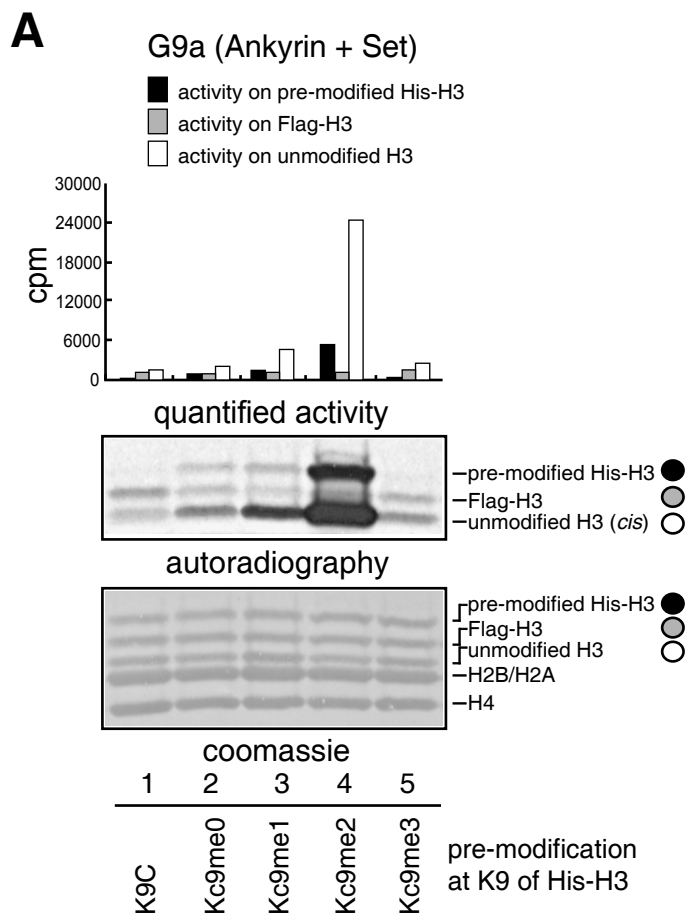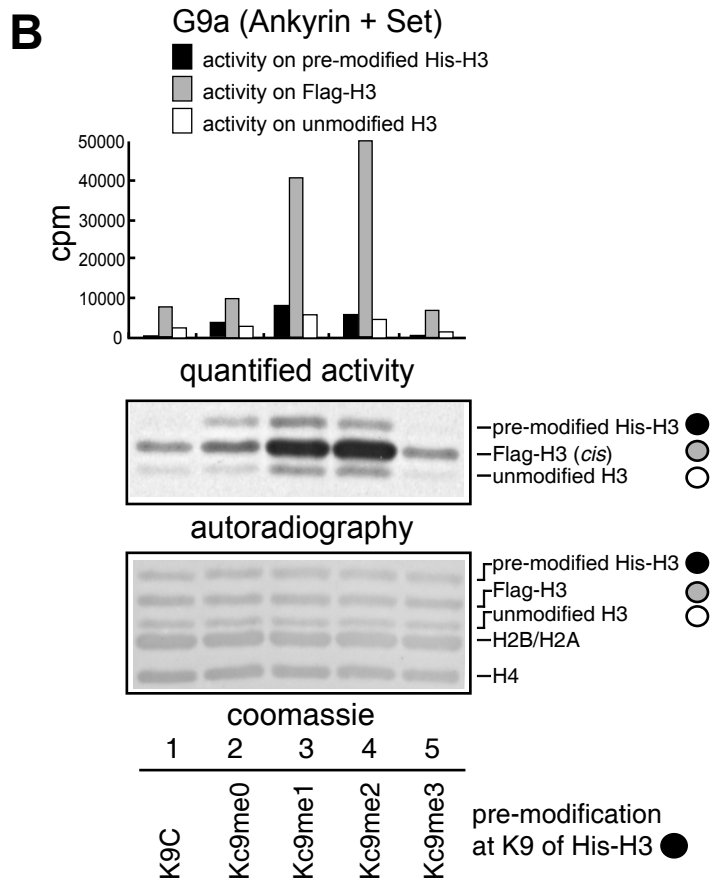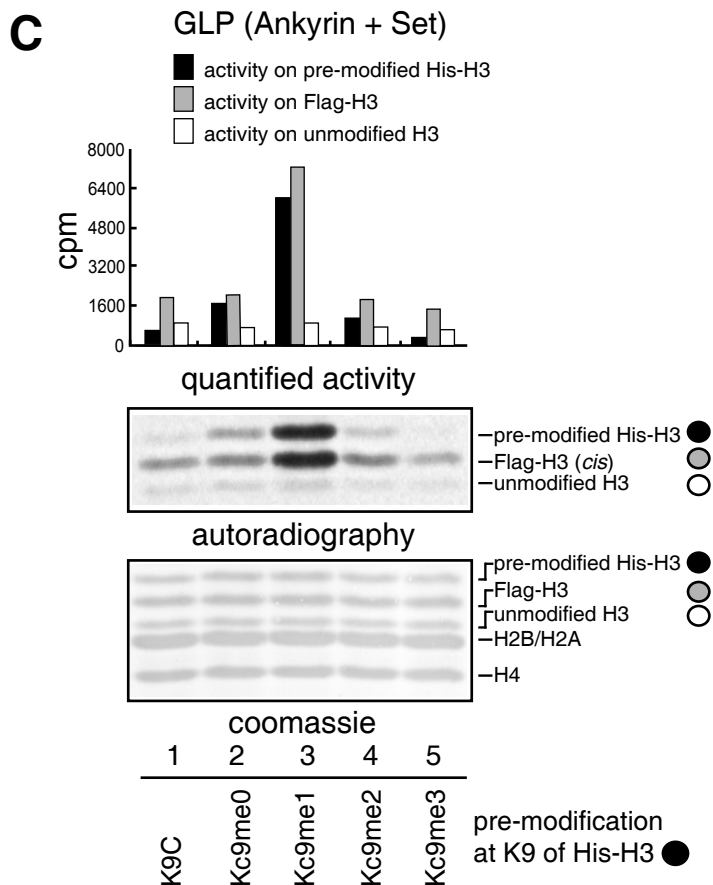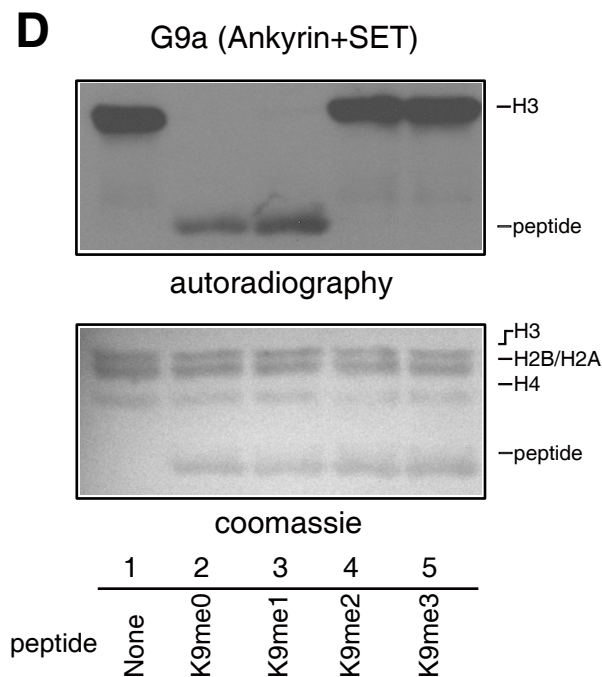

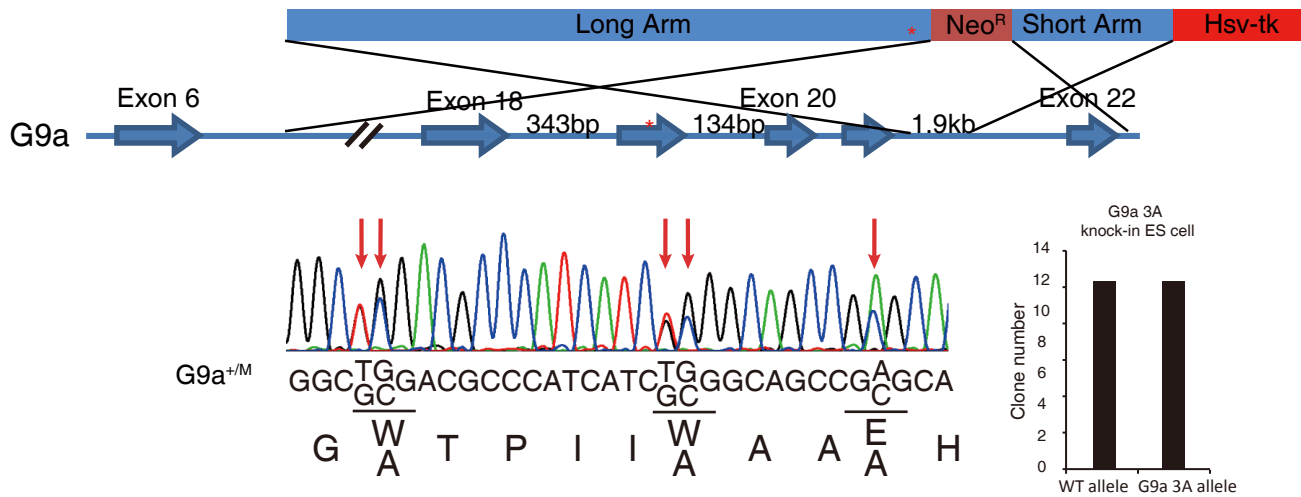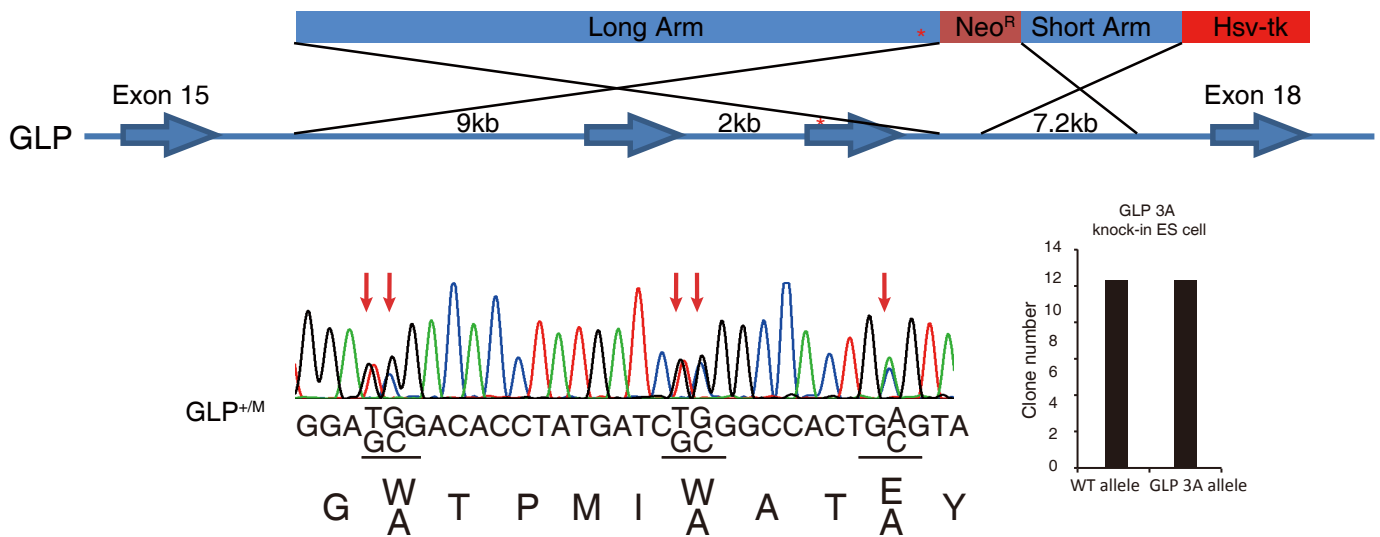



**A** Statistics of G9a<sup>+M</sup> intercross

|       | G9a <sup>+/+</sup> | G9a <sup>+M</sup> | G9a <sup>M/M</sup> |
|-------|--------------------|-------------------|--------------------|
| Day2  | 33                 | 70                | 36                 |
| Day4  | 33                 | 70                | 36                 |
| Day20 | 32                 | 68                | 33                 |

**B**

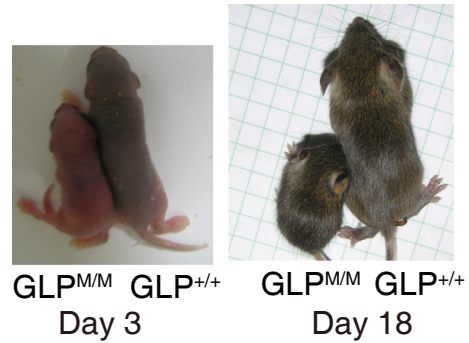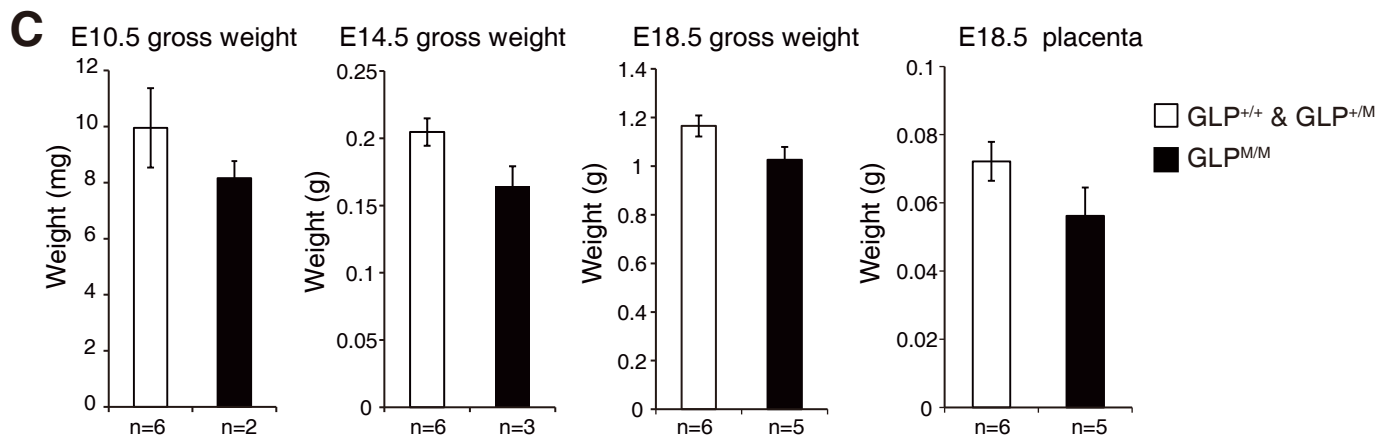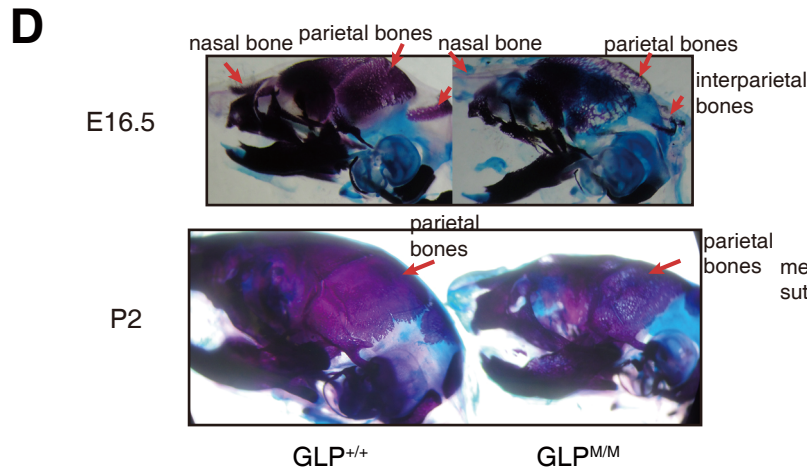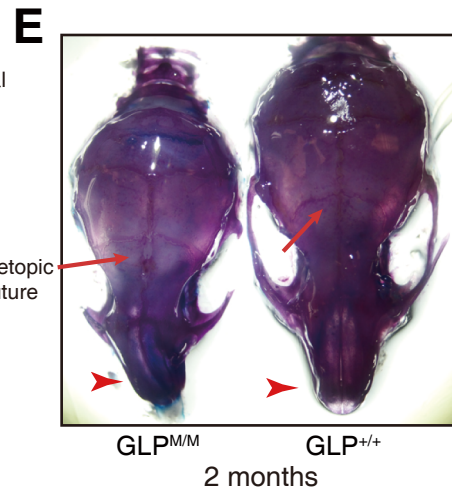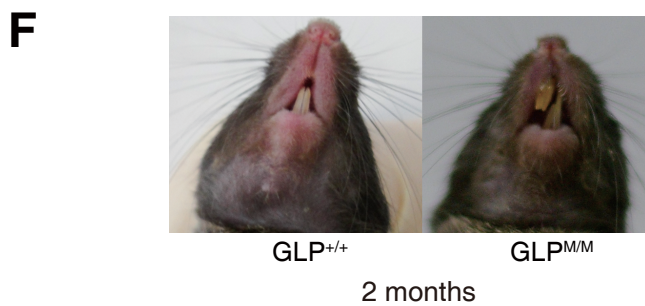

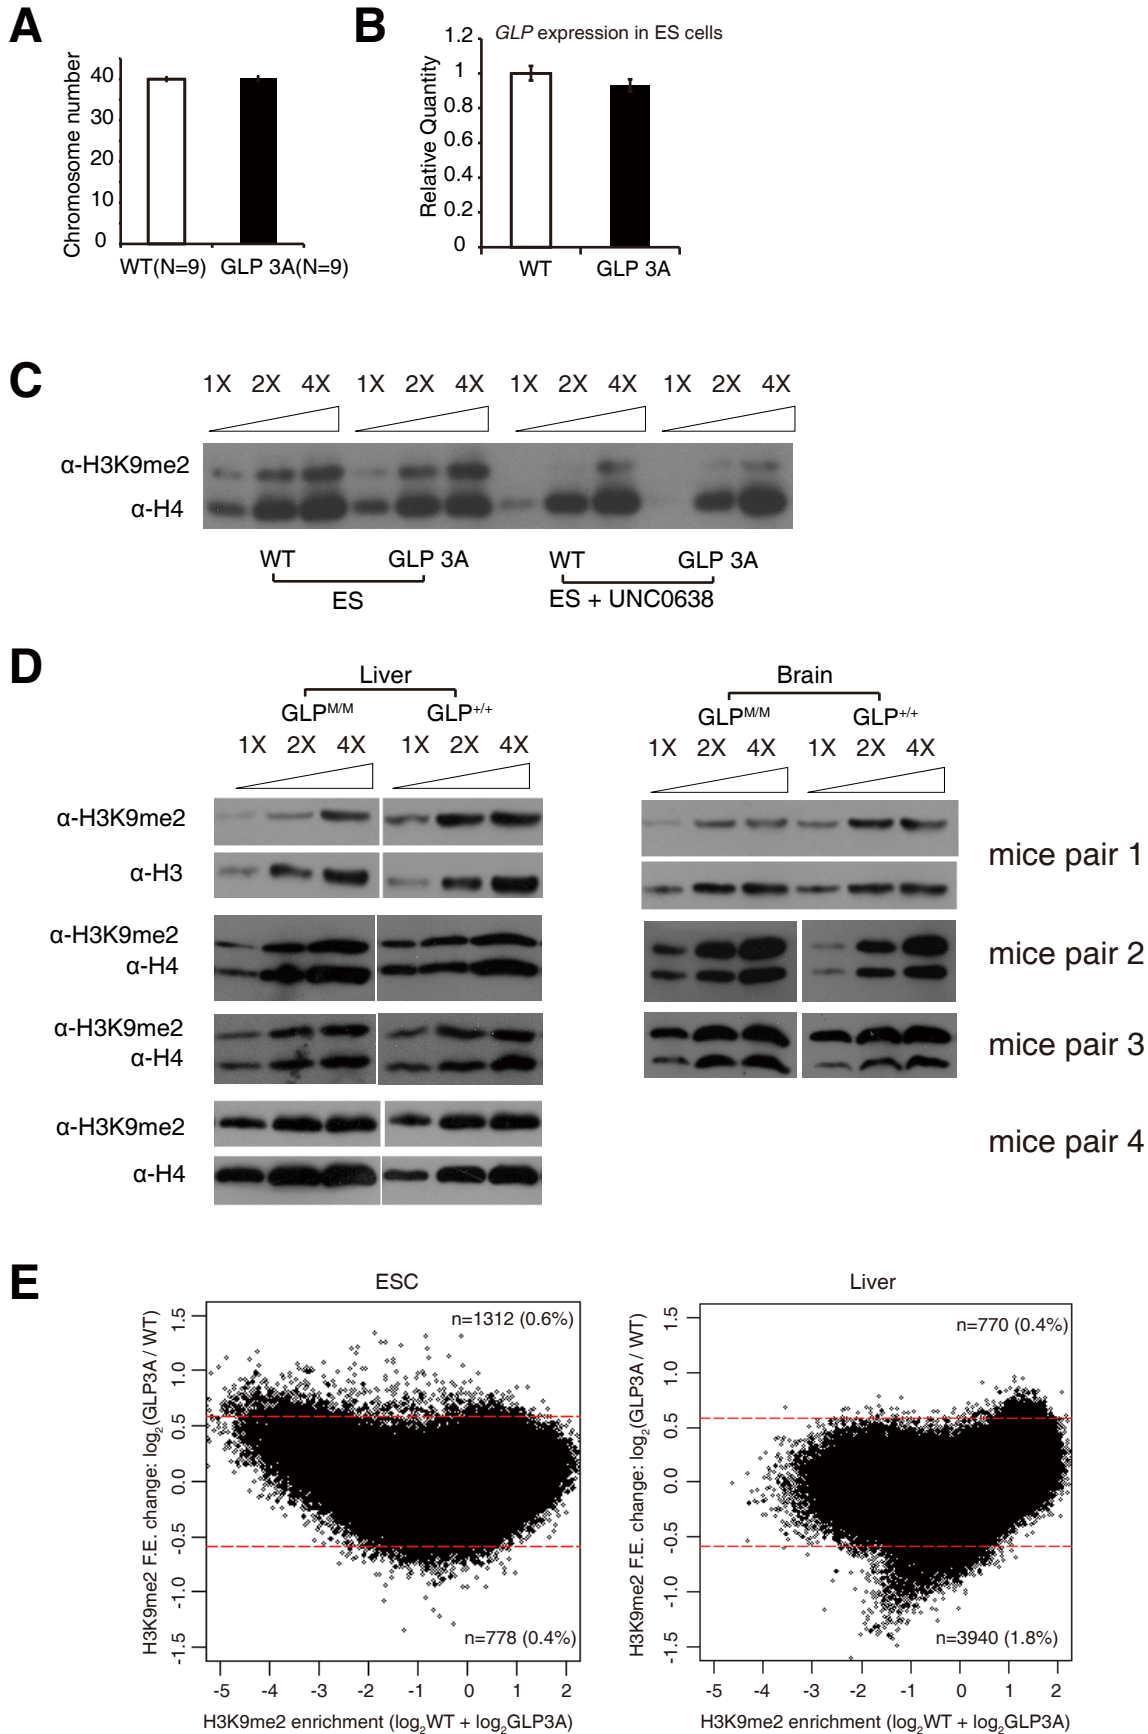

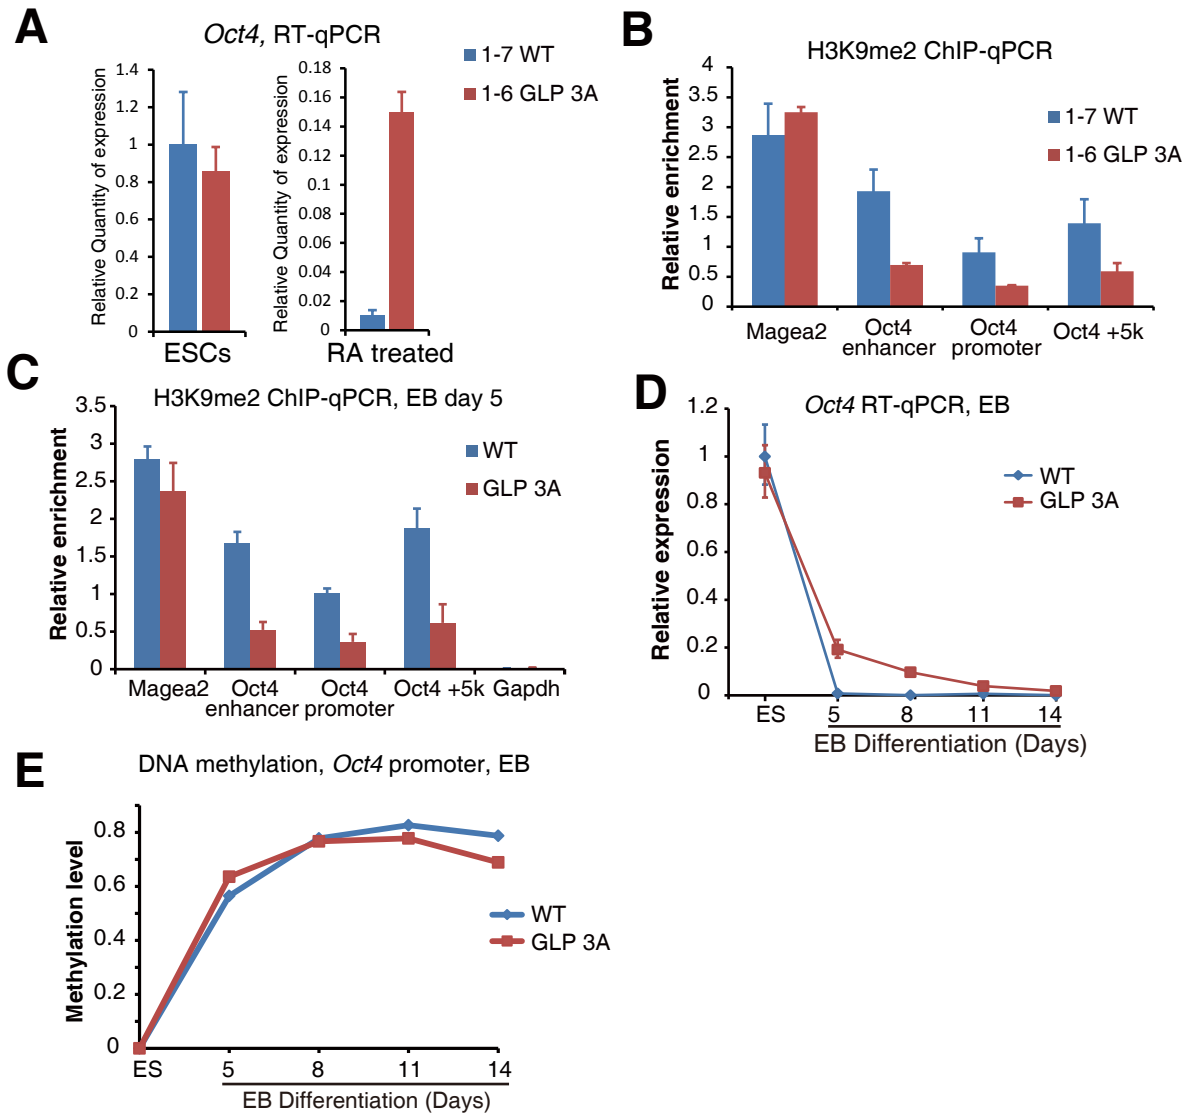

**A** RA differentiated, Day 2.5

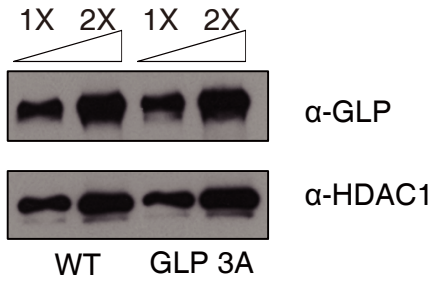

**B**

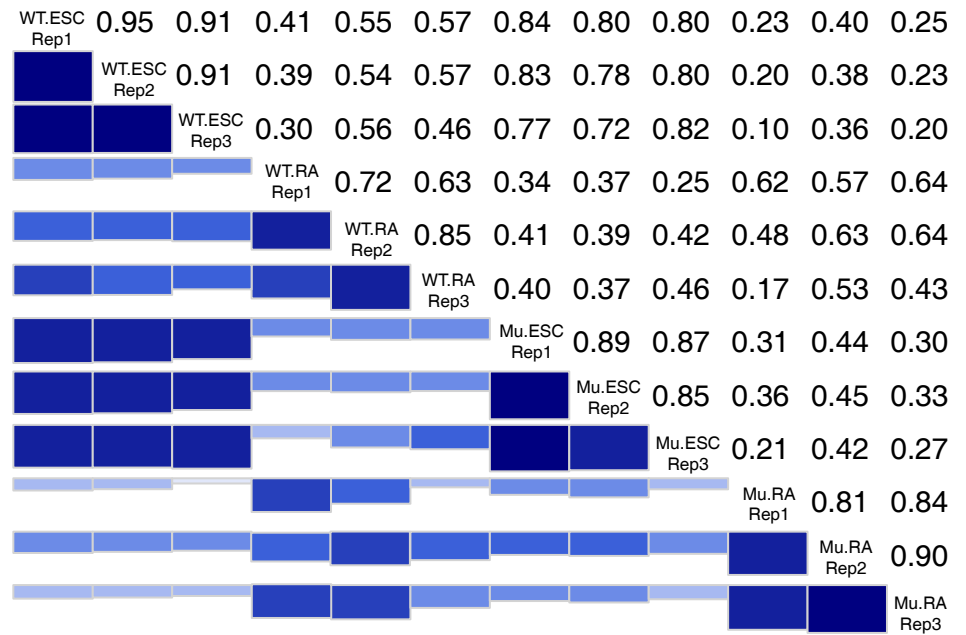

**C**

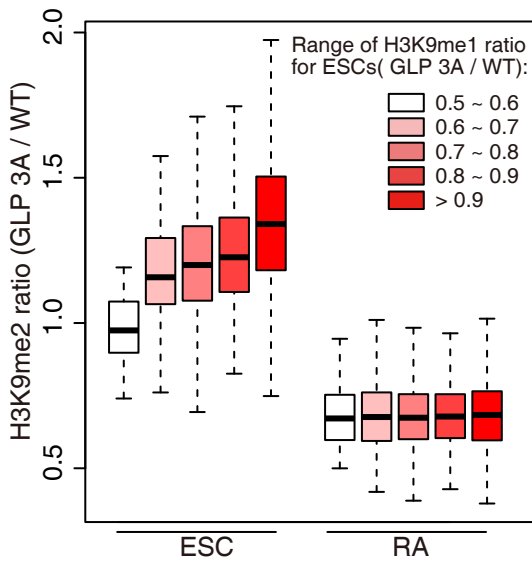

**D**

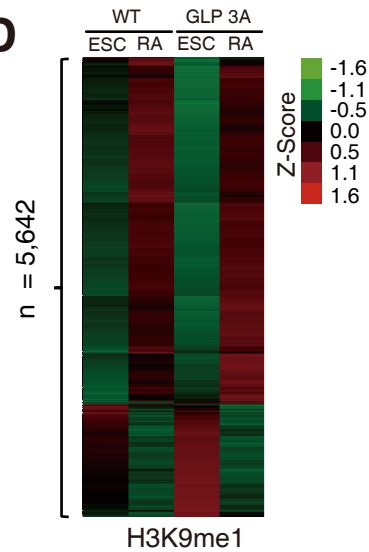

**E**

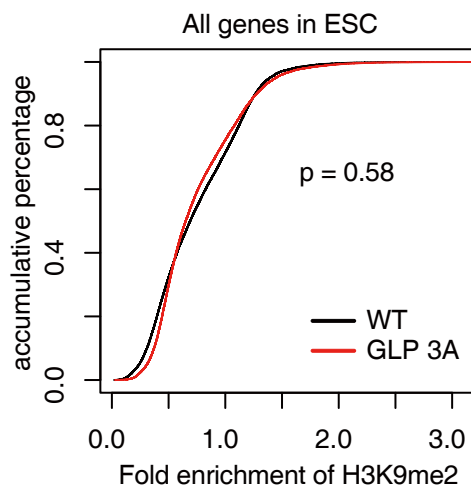

**F**

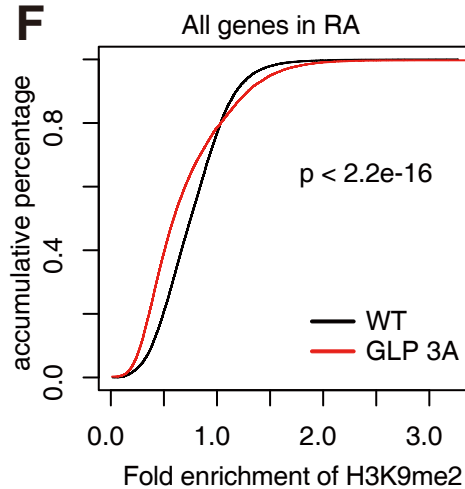

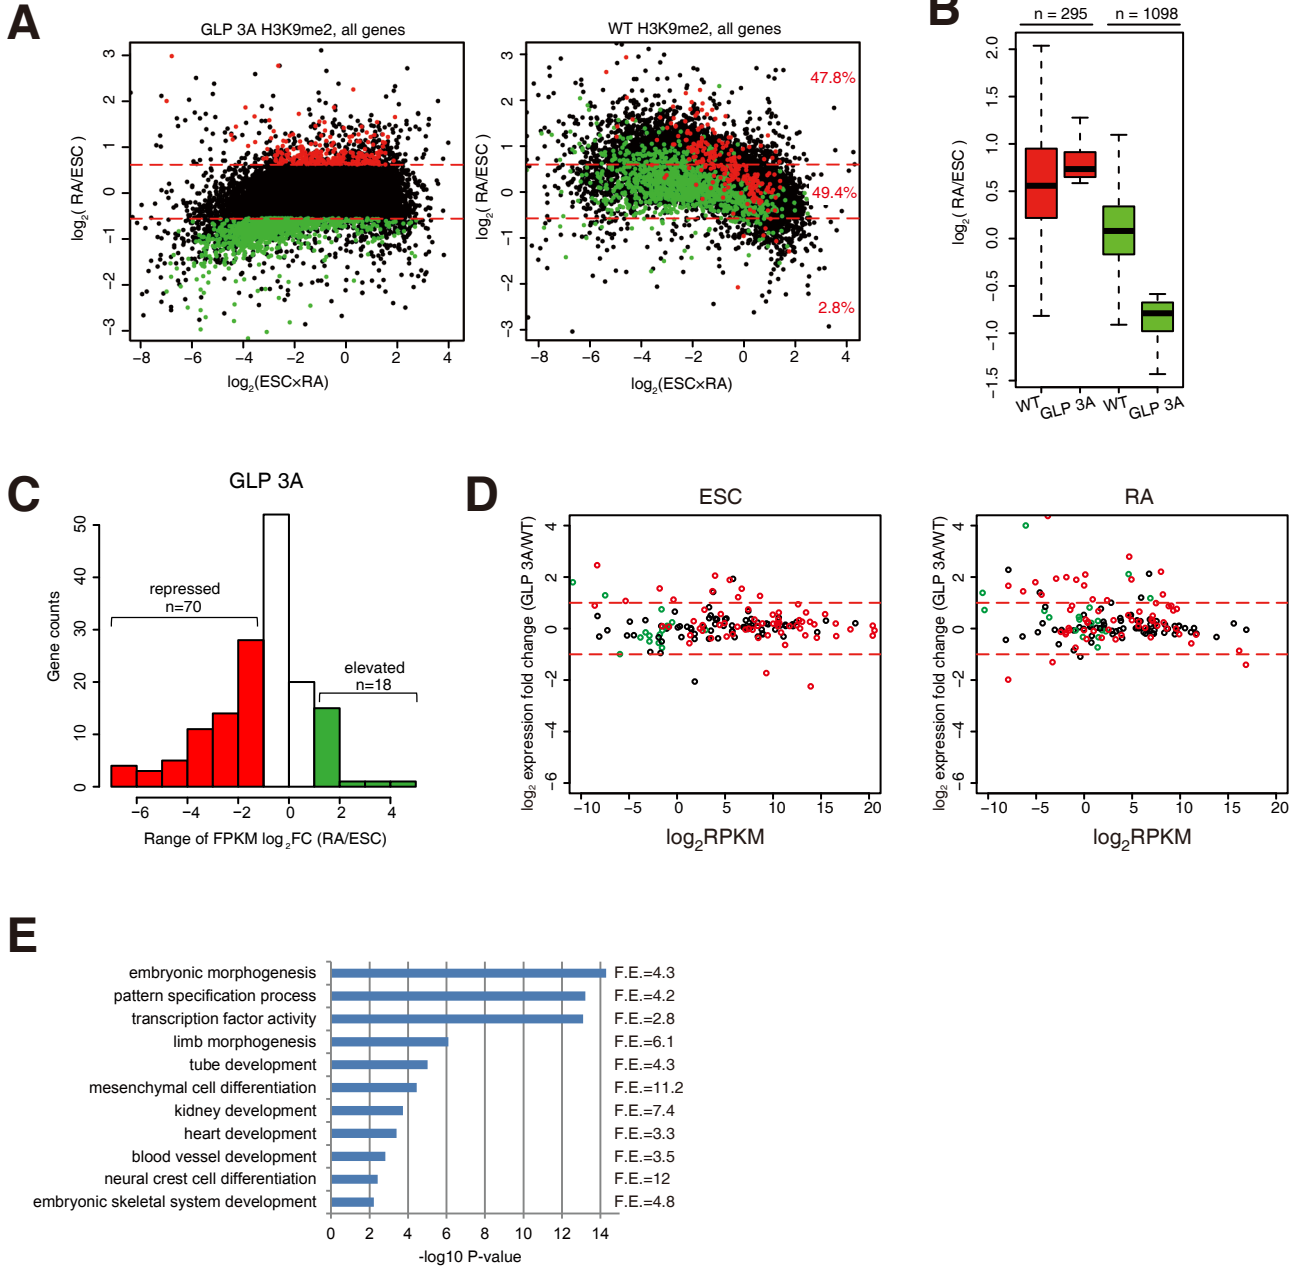

**Supplemental Table 1.** List of genes that are inefficiently repressed during differentiation of GLP 3A cells.

| Name          | H3K9me2 Fold Enrichment |              |              |              | P_value(WT.RA vs WT.ESC) | H3K9me2 FE ratio (Log2) |              | Expression FC (Log2) |               |              |
|---------------|-------------------------|--------------|--------------|--------------|--------------------------|-------------------------|--------------|----------------------|---------------|--------------|
|               | WT.ESC                  | WT.RA        | Mut.ESC      | Mut.RA       |                          | wRA/wES                 | muRA/muES    | WT.RA/WT.ESC         | Mu.RA/Mu.ESC  | Mu.RA/WT.RA  |
| <b>Esrrb</b>  | <b>0.445</b>            | <b>0.948</b> | <b>0.469</b> | <b>0.662</b> | <b>0.008</b>             | <b>1.092</b>            | <b>0.498</b> | <b>-8.112</b>        | <b>-5.351</b> | <b>2.336</b> |
| <b>Pou5f1</b> | <b>0.221</b>            | <b>0.618</b> | <b>0.248</b> | <b>0.405</b> | <b>0.017</b>             | <b>1.481</b>            | <b>0.707</b> | <b>-7.331</b>        | <b>-5.589</b> | <b>1.441</b> |
| <b>Fgf4</b>   | <b>0.100</b>            | <b>0.539</b> | <b>0.220</b> | <b>0.248</b> | <b>0.007</b>             | <b>2.433</b>            | <b>0.174</b> | <b>-9.220</b>        | <b>-7.414</b> | <b>1.790</b> |
| <b>Nanog</b>  | <b>0.293</b>            | <b>0.950</b> | <b>0.331</b> | <b>0.513</b> | <b>0.002</b>             | <b>1.695</b>            | <b>0.631</b> | <b>-6.872</b>        | <b>-4.359</b> | <b>2.909</b> |
| <b>Nr5a2</b>  | <b>0.607</b>            | <b>0.949</b> | <b>0.581</b> | <b>0.787</b> | <b>0.001</b>             | <b>0.645</b>            | <b>0.438</b> | <b>-7.825</b>        | <b>-5.193</b> | <b>2.765</b> |
| 4930548H24Rik | 0.690                   | 1.097        | 0.601        | 1.093        | 0.044                    | 0.670                   | 0.863        | -6.124               | -5.337        | 1.094        |
| 4930500J02Rik | 0.647                   | 1.060        | 0.415        | 0.748        | 0.037                    | 0.713                   | 0.852        | -2.501               | -2.380        | 1.131        |
| AU018091      | 0.521                   | 1.055        | 0.478        | 0.749        | 0.000                    | 1.017                   | 0.649        | -2.964               | -2.156        | 1.613        |
| Cela1         | 0.418                   | 0.768        | 0.472        | 0.468        | 0.033                    | 0.875                   | -0.011       | -1.719               | 0.741         | 1.230        |
| Hormad1       | 0.435                   | 0.824        | 0.532        | 0.715        | 0.041                    | 0.923                   | 0.426        | -3.856               | -2.696        | 2.542        |
| Gm9926        | 0.531                   | 0.798        | 0.516        | 0.688        | 0.010                    | 0.588                   | 0.415        | -1.289               | 1.078         | 2.716        |
| Mylpf         | 0.292                   | 1.101        | 0.288        | 0.517        | 0.010                    | 1.914                   | 0.846        | -6.482               | -3.241        | 2.816        |
| Sox15         | 0.087                   | 0.330        | 0.178        | 0.177        | 0.013                    | 1.925                   | -0.002       | -4.258               | -3.302        | 1.417        |
| Arhgef15      | 0.486                   | 0.830        | 0.505        | 0.544        | 0.028                    | 0.771                   | 0.106        | -2.473               | -1.773        | 1.035        |
| Lgals7        | 0.506                   | 1.220        | 0.448        | 0.595        | 0.015                    | 1.271                   | 0.408        | -4.226               | -2.577        | 4.041        |
| Prdm14        | 0.526                   | 0.859        | 0.504        | 0.565        | 0.008                    | 0.708                   | 0.165        | -7.007               | -4.467        | 2.660        |
| Snord1c       | 0.066                   | 0.240        | 0.270        | 0.136        | 0.007                    | 1.852                   | -0.987       | -5.199               | -1.797        | 2.933        |
| 4921517D22Rik | 0.639                   | 1.071        | 0.617        | 0.875        | 0.002                    | 0.744                   | 0.503        | -2.179               | inf           | 2.391        |
| Mospd4        | 0.259                   | 0.667        | 0.425        | 0.529        | 0.022                    | 1.367                   | 0.315        | -2.866               | -1.452        | 1.530        |
| Ttc9b         | 0.315                   | 0.589        | 0.593        | 0.566        | 0.025                    | 0.904                   | -0.066       | -4.175               | -1.520        | 3.672        |
| BC055111      | 0.517                   | 0.823        | 0.589        | 0.761        | 0.009                    | 0.671                   | 0.369        | -3.941               | -2.036        | 2.680        |
| 4930539E08Rik | 0.474                   | 0.770        | 0.497        | 0.514        | 0.044                    | 0.699                   | 0.051        | -3.351               | -2.132        | 1.553        |
| F13b          | 0.667                   | 1.107        | 0.696        | 1.092        | 0.044                    | 0.730                   | 0.650        | -1.148               | -0.092        | 1.350        |
| Klf2          | 0.133                   | 0.239        | 0.175        | 0.118        | 0.010                    | 0.845                   | -0.573       | -6.703               | -4.281        | 2.429        |
| Spp1          | 0.384                   | 0.823        | 0.426        | 0.668        | 0.038                    | 1.099                   | 0.650        | -5.401               | -3.754        | 2.482        |
| BC064078      | 0.670                   | 1.043        | 1.219        | 1.356        | 0.010                    | 0.640                   | 0.154        | -3.611               | -1.360        | 1.080        |
| Rhd           | 0.423                   | 0.807        | 0.436        | 0.482        | 0.046                    | 0.930                   | 0.143        | -2.234               | -0.538        | 1.743        |
| Tmc8          | 0.266                   | 0.589        | 0.344        | 0.296        | 0.041                    | 1.147                   | -0.213       | -1.386               | -0.325        | 1.065        |
| Npb           | 0.178                   | 0.313        | 0.280        | 0.114        | 0.026                    | 0.814                   | -1.304       | -1.344               | 0.864         | 2.324        |
| Gjb3          | 0.290                   | 0.661        | 0.261        | 0.269        | 0.007                    | 1.188                   | 0.045        | -3.591               | -3.036        | 1.509        |
| Kcnp2         | 0.424                   | 0.783        | 0.446        | 0.490        | 0.054                    | 0.885                   | 0.135        | -3.381               | -1.399        | 1.374        |
| Cidea         | 0.423                   | 0.649        | 0.505        | 0.481        | 0.048                    | 0.617                   | -0.070       | -2.630               | -0.916        | 2.824        |

|               |       |       |       |       |       |       |        |        |        |       |
|---------------|-------|-------|-------|-------|-------|-------|--------|--------|--------|-------|
| Chrna9        | 0.483 | 1.034 | 0.433 | 0.695 | 0.009 | 1.097 | 0.685  | -9.684 | -6.266 | 3.067 |
| Trh           | 0.484 | 1.002 | 0.445 | 0.524 | 0.018 | 1.050 | 0.235  | -9.053 | -8.166 | 1.261 |
| Gng3          | 0.263 | 0.799 | 0.333 | 0.423 | 0.027 | 1.605 | 0.346  | -1.274 | -0.144 | 1.447 |
| 1700019D03Rik | 0.592 | 0.917 | 0.761 | 1.000 | 0.009 | 0.630 | 0.393  | -6.732 | -4.555 | 1.320 |
| Prr15l        | 0.305 | 0.926 | 0.318 | 0.450 | 0.017 | 1.604 | 0.499  | -2.975 | -1.109 | 2.113 |
| Zp3           | 0.345 | 0.554 | 0.348 | 0.337 | 0.016 | 0.681 | -0.046 | -4.546 | -4.835 | 1.481 |
| Gsdma         | 0.659 | 1.015 | 0.594 | 0.600 | 0.012 | 0.622 | 0.014  | -4.228 | -1.497 | 2.083 |
| Aspdh         | 0.389 | 0.883 | 0.425 | 0.497 | 0.025 | 1.181 | 0.225  | -1.792 | 0.719  | 2.308 |
| Tsks          | 0.411 | 0.680 | 0.428 | 0.385 | 0.041 | 0.727 | -0.155 | -3.974 | -3.121 | 1.053 |
| Ndufa4l2      | 0.392 | 0.703 | 0.348 | 0.424 | 0.026 | 0.842 | 0.283  | -4.286 | -2.231 | 1.100 |
| Pycard        | 0.192 | 0.587 | 0.255 | 0.237 | 0.000 | 1.615 | -0.105 | -3.573 | -2.386 | 1.104 |
| Upp1          | 0.528 | 0.847 | 0.482 | 0.661 | 0.005 | 0.682 | 0.455  | -6.117 | -4.302 | 2.040 |
| Pla2g10       | 0.596 | 0.979 | 0.512 | 0.727 | 0.031 | 0.715 | 0.505  | -4.737 | -3.534 | 1.528 |
| Ngfr          | 0.353 | 0.574 | 0.387 | 0.325 | 0.017 | 0.700 | -0.254 | -3.074 | -1.235 | 1.601 |
| Zfp296        | 0.194 | 0.592 | 0.405 | 0.275 | 0.046 | 1.610 | -0.559 | -4.965 | -3.594 | 1.095 |
| D930028M14Rik | 0.284 | 0.556 | 0.459 | 0.340 | 0.045 | 0.968 | -0.431 | -4.480 | -1.351 | 2.918 |
| Gm6792        | 0.582 | 0.985 | 0.517 | 0.719 | 0.025 | 0.758 | 0.475  | -8.255 | -5.733 | 2.731 |
| 1700023L04Rik | 0.404 | 0.704 | 0.329 | 0.436 | 0.004 | 0.800 | 0.406  | -3.186 | -1.434 | 1.501 |
| Cpne9         | 0.540 | 0.819 | 0.513 | 0.590 | 0.038 | 0.602 | 0.201  | -4.675 | -4.412 | 1.300 |
| Gpa33         | 0.590 | 0.893 | 0.630 | 0.628 | 0.015 | 0.599 | -0.006 | -5.353 | -2.752 | 2.663 |
| E230025N22Rik | 0.449 | 0.969 | 0.437 | 0.504 | 0.014 | 1.111 | 0.207  | -1.296 | 1.070  | 2.038 |
| Gtsf1l        | 0.281 | 0.925 | 0.289 | 0.505 | 0.035 | 1.720 | 0.807  | -6.100 | -4.449 | 1.521 |
| Morn3         | 0.435 | 0.822 | 0.356 | 0.481 | 0.028 | 0.919 | 0.434  | -3.909 | -1.984 | 1.912 |
| Pfkip         | 0.620 | 1.024 | 0.598 | 0.761 | 0.010 | 0.723 | 0.348  | -5.072 | -3.779 | 1.019 |
| Lpar5         | 0.346 | 0.666 | 0.500 | 0.531 | 0.017 | 0.943 | 0.086  | -2.763 | -1.379 | 1.156 |
| Otx1          | 0.118 | 0.264 | 0.228 | 0.174 | 0.024 | 1.165 | -0.390 | -1.282 | 0.309  | 1.110 |
| Cd68          | 0.351 | 1.190 | 0.231 | 0.573 | 0.015 | 1.763 | 1.311  | -1.221 | -0.779 | 1.186 |
| Gm13939       | 0.402 | 0.659 | 0.437 | 0.532 | 0.003 | 0.715 | 0.282  | -6.325 | -4.666 | 1.281 |
| Lefty2        | 0.308 | 0.561 | 0.406 | 0.323 | 0.004 | 0.864 | -0.331 | -6.109 | -4.609 | 2.308 |
| Wnt8a         | 0.418 | 0.750 | 0.409 | 0.392 | 0.015 | 0.844 | -0.063 | -1.872 | -1.686 | 2.062 |
| Till13        | 0.504 | 0.827 | 0.448 | 0.551 | 0.013 | 0.715 | 0.297  | -1.335 | -1.013 | 1.052 |
| Gm6537        | 0.514 | 0.964 | 0.510 | 0.470 | 0.047 | 0.907 | -0.120 | inf    | 1.371  | 2.286 |
| Tspan1        | 0.666 | 1.053 | 0.432 | 0.743 | 0.037 | 0.660 | 0.783  | -1.507 | -2.164 | 1.066 |
| Gm15698       | 0.714 | 1.089 | 0.497 | 0.893 | 0.012 | 0.610 | 0.846  | -1.042 | -0.356 | 2.668 |
| Rasgrp2       | 0.347 | 0.753 | 0.379 | 0.381 | 0.007 | 1.116 | 0.006  | -5.407 | -4.486 | 1.719 |
| 2410007B07Rik | 0.516 | 1.061 | 0.459 | 1.149 | 0.010 | 1.041 | 1.324  | -8.316 | -6.778 | 1.807 |

|               |       |       |       |       |       |       |        |        |        |       |
|---------------|-------|-------|-------|-------|-------|-------|--------|--------|--------|-------|
| Slc35f2       | 0.515 | 0.847 | 0.500 | 0.679 | 0.000 | 0.718 | 0.441  | -1.595 | -1.548 | 1.075 |
| Napsa         | 0.606 | 1.098 | 0.604 | 0.829 | 0.025 | 0.857 | 0.456  | -4.406 | -1.142 | 1.332 |
| Gm7325        | 0.146 | 0.425 | 0.203 | 0.291 | 0.022 | 1.542 | 0.516  | -8.293 | -5.287 | 2.492 |
| Mmp21         | 0.613 | 1.140 | 0.465 | 0.824 | 0.008 | 0.895 | 0.825  | -1.326 | 0.724  | 1.994 |
| Xist          | 0.246 | 0.634 | 0.487 | 0.535 | 0.000 | 1.366 | 0.136  | -3.393 | 0.065  | 1.410 |
| D7Erd143e     | 0.074 | 0.553 | 0.183 | 0.364 | 0.002 | 2.907 | 0.987  | -6.287 | -4.789 | 1.860 |
| 4930578M01Rik | 0.235 | 0.513 | 0.248 | 0.269 | 0.034 | 1.128 | 0.117  | -2.994 | 0.974  | 2.948 |
| Nlrp4f        | 0.618 | 0.974 | 0.587 | 0.777 | 0.011 | 0.656 | 0.405  | -5.147 | -4.281 | 1.437 |
| Ctf2          | 0.538 | 0.839 | 0.535 | 0.591 | 0.013 | 0.640 | 0.143  | -1.120 | 0.882  | 2.147 |
| Trim12a       | 0.733 | 1.101 | 0.685 | 0.969 | 0.025 | 0.588 | 0.501  | -1.321 | -0.715 | 2.768 |
| Nr0b1         | 0.215 | 0.568 | 0.315 | 0.378 | 0.009 | 1.402 | 0.266  | -8.383 | -6.297 | 1.719 |
| Phlda2        | 0.129 | 0.304 | 0.288 | 0.228 | 0.021 | 1.245 | -0.338 | -1.660 | 0.230  | 1.112 |
| Rnf135        | 0.525 | 0.862 | 0.516 | 0.667 | 0.027 | 0.715 | 0.372  | -1.174 | -0.988 | 1.287 |
| Neat1         | 0.150 | 0.823 | 0.268 | 0.279 | 0.036 | 2.457 | 0.061  | -1.257 | 0.335  | 1.108 |
| Trim34a       | 0.472 | 0.735 | 0.565 | 0.697 | 0.002 | 0.637 | 0.303  | -1.375 | -0.947 | 1.403 |
| Rnf39         | 0.338 | 0.659 | 0.327 | 0.246 | 0.032 | 0.962 | -0.412 | -3.026 | -0.944 | 1.088 |
| Hsd17b14      | 0.299 | 0.686 | 0.319 | 0.334 | 0.009 | 1.199 | 0.063  | -6.302 | -5.164 | 1.246 |
| Zyg11a        | 0.463 | 0.870 | 0.493 | 0.622 | 0.001 | 0.910 | 0.335  | -4.820 | -2.518 | 2.209 |
| Gdf3          | 0.367 | 1.002 | 0.284 | 0.605 | 0.030 | 1.449 | 1.092  | -5.052 | -4.629 | 1.245 |
| Syng1         | 0.450 | 0.840 | 0.466 | 0.511 | 0.104 | 0.900 | 0.133  | -2.474 | -1.171 | 1.086 |
| Ooep          | 0.333 | 1.301 | 0.447 | 0.638 | 0.022 | 1.967 | 0.514  | -4.984 | -3.467 | 2.123 |
| Gm15441       | 0.278 | 0.444 | 0.329 | 0.356 | 0.026 | 0.673 | 0.117  | -2.213 | 0.281  | 1.225 |
| Tdrd12        | 0.595 | 0.924 | 0.503 | 0.680 | 0.004 | 0.637 | 0.434  | -4.031 | -4.089 | 1.077 |
| Fgr           | 0.502 | 0.781 | 0.412 | 0.451 | 0.038 | 0.637 | 0.130  | -5.926 | -3.195 | 3.059 |
| Saa3          | 0.308 | 0.548 | 0.385 | 0.323 | 0.047 | 0.831 | -0.256 | -3.361 | -3.352 | 2.749 |
| Tdgf1         | 0.242 | 0.658 | 0.273 | 0.397 | 0.010 | 1.442 | 0.538  | -9.641 | -7.110 | 2.985 |
| Tuba4a        | 0.351 | 0.853 | 0.343 | 0.451 | 0.041 | 1.280 | 0.396  | -3.644 | -2.196 | 1.055 |
| Till6         | 0.470 | 0.754 | 0.507 | 0.506 | 0.042 | 0.681 | -0.002 | -1.729 | -1.569 | 1.347 |
| Lctl          | 0.457 | 0.768 | 0.533 | 0.551 | 0.009 | 0.749 | 0.048  | -2.586 | -3.405 | 1.145 |
| Parp9         | 0.469 | 0.816 | 0.458 | 0.560 | 0.000 | 0.799 | 0.289  | -1.164 | -0.659 | 1.266 |
| Dnajc22       | 0.424 | 0.780 | 0.421 | 0.535 | 0.030 | 0.879 | 0.345  | -1.530 | -0.006 | 1.459 |
| Gstm3         | 0.709 | 1.342 | 0.572 | 0.900 | 0.044 | 0.920 | 0.653  | -6.112 | -4.242 | 4.138 |
| 2410017117Rik | 0.489 | 0.803 | 0.459 | 0.586 | 0.002 | 0.716 | 0.351  | -3.380 | -2.755 | 2.430 |
| Calcoco2      | 0.400 | 0.739 | 0.381 | 0.458 | 0.007 | 0.887 | 0.267  | -2.146 | -1.448 | 2.798 |
| Tm4sf5        | 0.404 | 0.740 | 0.383 | 0.356 | 0.032 | 0.872 | -0.109 | -2.770 | -1.149 | 2.068 |
| Tchh          | 0.150 | 0.324 | 0.290 | 0.390 | 0.020 | 1.110 | 0.431  | -1.611 | 0.826  | 1.472 |



|         |       |       |       |       |       |       |        |        |        |       |
|---------|-------|-------|-------|-------|-------|-------|--------|--------|--------|-------|
| Gngt2   | 0.799 | 1.284 | 0.563 | 0.728 | 0.131 | 0.684 | 0.372  | -3.843 | -2.640 | 1.270 |
| Slc10a1 | 0.594 | 0.904 | 0.495 | 0.578 | 0.007 | 0.606 | 0.222  | -2.922 | -0.897 | 1.701 |
| Cbln1   | 0.107 | 0.278 | 0.311 | 0.141 | 0.015 | 1.377 | -1.140 | -2.234 | -1.136 | 1.181 |
| Mt1     | 0.054 | 0.241 | 0.209 | 0.169 | 0.017 | 2.158 | -0.302 | -2.878 | -2.184 | 1.958 |
| Phkg1   | 0.348 | 0.790 | 0.428 | 0.535 | 0.002 | 1.184 | 0.325  | -2.274 | -1.130 | 1.466 |
| Dlgap3  | 0.628 | 0.986 | 0.546 | 0.693 | 0.024 | 0.651 | 0.344  | -4.643 | -3.475 | 1.102 |

---

**Supplemental Table 2.** Antibodies for western blot and ChIP experiments.

| <b>Antibody</b> | <b>Brand</b>       | <b>Purpose</b>    |
|-----------------|--------------------|-------------------|
| H3K9me1         | Ab8896 (abcam)     | Western, ChIP-seq |
| H3K9me2         | Ab1220 (abcam)     | Western, ChIP-seq |
| H3K27me3        | Ab8898 (abcam)     | Western           |
| H3              | 07-690 (millipore) | Western           |
| H4              | 04-858 (millipore) | Western           |
| HDAC1           | Ab46985 (abcam)    | Western           |
| GLP             | Ab41969 (abcam)    | Western           |

**Supplemental Table 3.** Sequencing depth of the ChIP-seq and RNA-seq experiments.

| Replicate | Experiment           | Raw Reads#  | Uniquely mapped# | %      |
|-----------|----------------------|-------------|------------------|--------|
| Rep1      | WT-ESC-H3K9me2-ChIP  | 133,115,195 | 89,755,597       | 67.43% |
|           | WT-ESC-input         | 142,175,701 | 97,958,070       | 68.90% |
|           | Mut-ESC-H3K9me2-ChIP | 125,814,498 | 78,711,670       | 62.56% |
|           | Mut-ESC-input        | 145,872,824 | 101,144,050      | 69.34% |
|           | WT-RA-H3K9me2-ChIP   | 164,656,848 | 113,632,886      | 69.01% |
|           | WT-RA-input          | 143,064,229 | 92,922,316       | 64.95% |
|           | Mut-RA-H3K9me2-ChIP  | 141,392,832 | 91,562,507       | 64.76% |
|           | Mut-RA-input         | 158,087,474 | 102,324,012      | 64.73% |
| Rep2      | WT-ESC-H3K9me2-ChIP  | 87,970,077  | 59,388,157       | 67.51% |
|           | WT-ESC-input         | 54,065,164  | 37,514,449       | 69.39% |
|           | Mut-ESC-H3K9me2-ChIP | 87,325,816  | 56,437,180       | 64.63% |
|           | Mut-ESC-input        | 56,927,763  | 39,612,709       | 69.58% |
|           | WT-RA-H3K9me2-ChIP   | 160,111,523 | 107,076,147      | 66.88% |
|           | WT-RA-input          | 87,417,918  | 60,307,324       | 68.99% |
|           | Mut-RA-H3K9me2-ChIP  | 135,473,619 | 89,927,104       | 66.38% |
|           | Mut-RA-input         | 78,979,683  | 55,164,902       | 69.85% |
| Rep3      | WT-ESC-H3K9me2-ChIP  | 43,039,558  | 30,038,960       | 69.79% |
|           | WT-ESC-input         | 64,985,331  | 46,385,557       | 71.38% |
|           | Mut-ESC-H3K9me2-ChIP | 51,521,142  | 34,389,342       | 66.75% |
|           | Mut-ESC-input        | 73,513,062  | 52,689,438       | 71.67% |
|           | WT-RA-H3K9me2-ChIP   | 63,770,383  | 47,600,048       | 74.64% |
|           | WT-RA-input          | 99,818,550  | 70,430,875       | 70.56% |
|           | Mut-RA-H3K9me2-ChIP  | 57,593,598  | 41,274,037       | 71.66% |
|           | Mut-RA-input         | 79,698,645  | 55,021,699       | 69.04% |
| Rep1      | WT-RA-RNASeq         | 61,395,164  | 58,039,354       | 94.53% |
|           | Mut-RA-RNASeq        | 58,600,606  | 55,525,098       | 94.75% |
|           | WT-ESC-RNASeq        | 60,040,755  | 57,755,123       | 96.19% |
|           | Mut-ESC-RNASeq       | 56,570,531  | 55,627,909       | 98.33% |
| Rep2      | WT-RA-RNASeq         | 28,985,182  | 27,982,795       | 96.54% |
|           | Mut-RA-RNASeq        | 24,102,364  | 22,745,515       | 94.37% |
|           | WT-ESC-RNASeq        | 29,192,128  | 28,801,683       | 98.66% |
|           | Mut-ESC-RNASeq       | 25,702,281  | 25,294,095       | 98.41% |
| H3K9me1   | WT-ESC-H3K9me1-ChIP  | 80,565,505  | 63,530,116       | 78.86% |
|           | Mut-ESC-H3K9me1-ChIP | 87,248,558  | 68,447,868       | 78.45% |
|           | WT-RA-H3K9me1-ChIP   | 169,158,915 | 140,252,959      | 82.91% |
|           | Mut-RA-H3K9me1-ChIP  | 179,858,424 | 149,948,834      | 83.37% |

**Supplemental Table 4.** Primers sequences for ChIP-qPCR and RT-qPCR.

---

|                  |                           |
|------------------|---------------------------|
| Olf18_ChIP_F     | TGTCACCCCTATGCTCAACCC     |
| Olf18_ChIP_R     | GGAAACAGAATAAATGGCACCG    |
| Gapdh_ChIP_F     | CTCTCTTTGGACCCGCCTCATTT   |
| Gapdh_ChIP_R     | GAGTCCTATCCTGGGAACCATCAC  |
| Magea2_ChIP_F    | TTGGTGGACAGGGAAGCTAGGGGA  |
| Magea2_ChIP_R    | CGCTCCAGAACAAAATGGCGCAGA  |
| Oct4_ChIP_enh_F  | TCACCCTGGGGCCTTCGTTCA     |
| Oct4_ChIP_enh_R  | CCCATTCTGTGCTGGCGGA       |
| Oct4_ChIP_prom_F | GTGGGTAAGCAAGAACTGAGGA    |
| Oct4_ChIP_prom_R | TGGAGAGCCTAAAACATCCATT    |
| Oct4_ChIP_5k_F   | TGTCTACAATGCCAGAATAGGTCAA |
| Oct4_ChIP_5k_R   | GCCTACAGAGTTCCAGATAGCC    |
| Nanog_ChIP_F     | GAATAGGGGGTGGGTAGGGT      |
| Nanog_ChIP_R     | AGCCTTCCCACAGAAAGAGC      |
| Nanog_ChIP_F     | ACAATGTCCATGGTGGACCC      |
| Nanog_ChIP_R     | ACCCTACCCACCCCTATTC       |
| Fgf4_ChIP_F      | TCTCCAGGTGACAGTAGCCA      |
| Fgf4_ChIP_R      | GAGCAAATAGGGACGCAACG      |
| Fgf4_ChIP_F      | CTGCCCCAAGGTGAAGGAAT      |
| Fgf4_ChIP_R      | TGTGGAAGAGAAGCAGGCAG      |
| Esrrb_ChIP_F     | ATGCTTAACGCCATCCCCAA      |
| Esrrb_ChIP_R     | AATCCAGGTCTTGAGCTGCC      |
| Esrrb_RT_F       | GAACACTCTCGCCTGGTAGG      |
| Esrrb_RT_R       | CGCCTCCAGGTTCTCAATGT      |
| Fgf4_RT_F        | TGGGCCTCAAAGGCTTCG        |
| Fgf4_RT_R        | ACTCCGAAGATGCTCACCAC      |
| Oct4_RT_F        | TGAGAACCTTCAGGAGATATGCAA  |
| Oct4_RT_R        | CTCAATGCTAGTTCGCTTTCTCTTC |
| Nanog_RT_F       | TCGAATTCTGGAACGCCTC       |
| Nanog_RT_R       | GTCTTCAGAGGAAGGGCGAG      |
| Gapdh_RT_F       | CTTTGGCATTGTGGAAGGGC      |
| Gapdh_RT_R       | CAGGGATGATGTTCTGGGCA      |

---
